# Supplementary material for: Engineered (hep/pARG)2polyelectrolyte capsules for sustained release of bioactive TGF-β1
Source: Royal Society of Chemistry journal article supplement (doi:10.1039/c1sm06618h), 2011-11-24
Supplement: c1sm06618h.pdf [file c1sm06618h.pdf]

## Engineered (hep/pARG)<sub>2</sub> polyelectrolyte capsules for sustained release of bioactive

### SUPPLEMENTARY INFORMATION

#### TGF- $\beta_1$ release from polyelectrolyte capsules stimulates myofibroblast differentiation in tissue engineering scaffolds

Liesbeth J. De Cock,<sup>a</sup> Olivier De Wever,<sup>b</sup> Sandra Van Vlierberghe,<sup>c</sup> Els Vanderleyden,<sup>c</sup> Peter Dubruel,<sup>c</sup> Filip De Vos,<sup>d</sup> Chris Vervaet,<sup>a</sup> Jean Paul Remon<sup>a</sup> and Bruno G. De Geest<sup>\*a</sup>

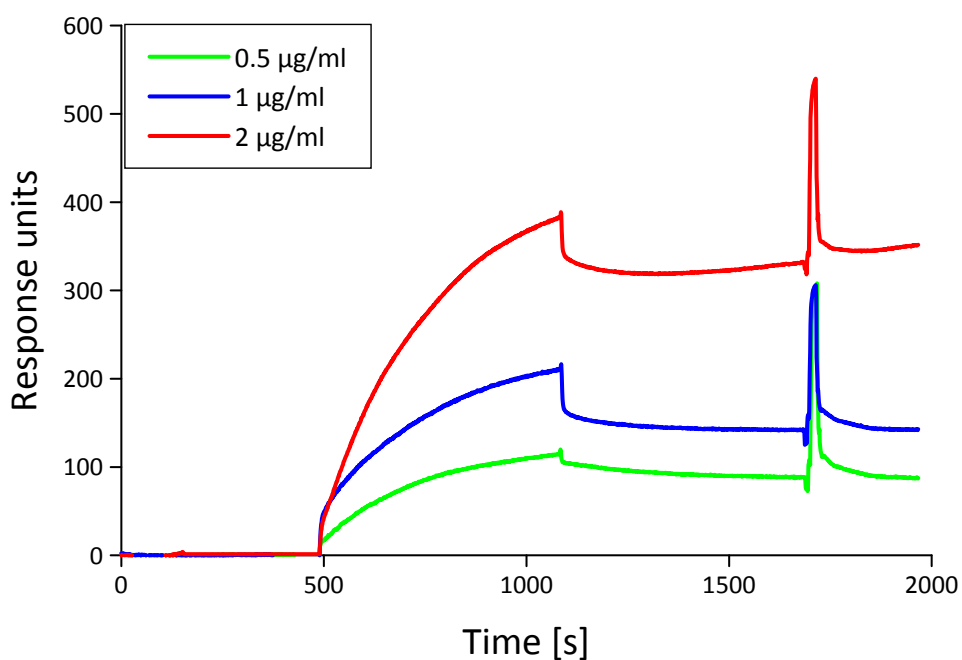

**Fig. S1** Surface plasmon resonance sensorgram showing the interaction between TGF- $\beta$  and methacrylamide-modified gelatin.

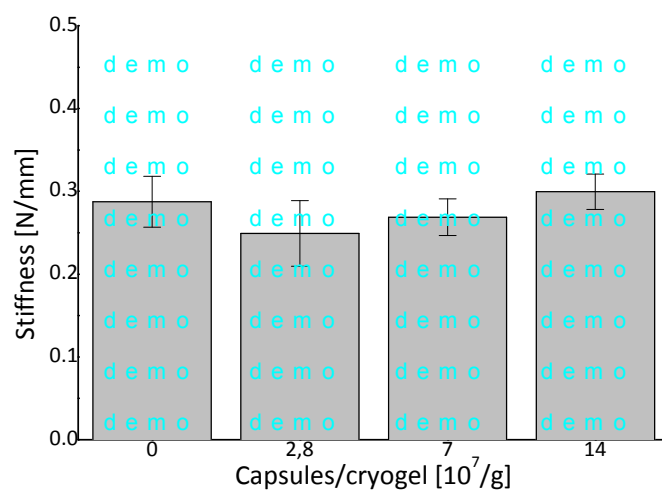

**Fig. S2** Stiffness of cryogel scaffolds as a function of the amount of incorporated microcapsules.
